# Supplementary material for: Effect of Ultrasound-Assisted Extraction Parameters on Total Polyphenols and Its Antioxidant Activity from Mango Residues (Mangifera indica L. var. Manililla)
Source: MDPI journal article supplement (doi:10.3390/separations8070094), 2021-06-30
Supplement: s1 [file s1]

# Effect of ultrasound-assisted extraction parameters on total polyphenols and its antioxidant activity from mango residues (*Mangifera indica* L. var. *Manililla*)

Anahí J. Borrás-Enríquez, Elizabeth Reyes-Ventura, Socorro J. Villanueva-Rodríguez and Lorena Moreno-Vilet\*

<sup>1</sup>Centro de Investigación y Asistencia en Tecnología y Diseño del Estado de Jalisco A.C., Tecnología alimentaria. Camino Arenero 1227, El Bajío, 45019 Zapopan, Jalisco, México. [anajo\\_borras@hotmail.com](mailto:anajo_borras@hotmail.com) (A.J.B.-E.); [reyesventura121@gmail.com](mailto:reyesventura121@gmail.com) (E.R.-V.); [lmoreno@ciatej.mx](mailto:lmoreno@ciatej.mx) (L.M.-V.); [svil-lanueva@ciatej.mx](mailto:svil-lanueva@ciatej.mx) (S.J.V.-R.)

**Table S1.** Analysis of variance (ANOVA) for total polyphenols content.

| TOTAL POLYPHENOLS                              |      |         |         |        |              |          |        |        |        |              |        |        |        |       |              |
|------------------------------------------------|------|---------|---------|--------|--------------|----------|--------|--------|--------|--------------|--------|--------|--------|-------|--------------|
| Source                                         | PEEL |         |         |        |              | ENDOCARP |        |        |        |              | KERNEL |        |        |       |              |
|                                                | DF   | SS      | MS      | F      | p            | DF       | SS     | MS     | F      | p            | DF     | SS     | MS     | F     | p            |
|                                                |      | Adj.    | Adj.    | Value  | Value        |          | Adj.   | Adj.   | Value  | Value        |        | Adj.   | Adj.   | Value | Value        |
| Model                                          | 8    | 6050699 | 756337  | 43.73  | <b>0.000</b> | 8        | 345052 | 43131  | 45.79  | <b>0.000</b> | 8      | 283049 | 35381  | 6.03  | <b>0.002</b> |
| Linear                                         | 3    | 637319  | 212440  | 12.28  | <b>0.000</b> | 3        | 19037  | 6346   | 6.74   | <b>0.006</b> | 3      | 8461   | 2820   | 0.48  | 0.702        |
| X <sub>1</sub>                                 | 1    | 488601  | 488601  | 28.25  | <b>0.000</b> | 1        | 7470   | 7470   | 7.93   | <b>0.015</b> | 1      | 4342   | 4342   | 0.74  | 0.405        |
| X <sub>2</sub>                                 | 1    | 9216    | 9216    | 0.53   | 0.478        | 1        | 467    | 467    | 0.50   | 0.494        | 1      | 1529   | 1529   | 0.26  | 0.618        |
| X <sub>3</sub>                                 | 1    | 139502  | 139502  | 8.07   | <b>0.014</b> | 1        | 11100  | 11100  | 11.78  | <b>0.004</b> | 1      | 2590   | 2590   | 0.44  | 0.518        |
| Interaccions of 2 terms                        | 3    | 21866   | 7289    | 0.42   | 0.741        | 3        | 15890  | 5297   | 5.62   | <b>0.011</b> | 3      | 8343   | 2781   | 0.47  | 0.706        |
| X <sub>1</sub> *X <sub>2</sub>                 | 1    | 2025    | 2025    | 0.12   | 0.738        | 1        | 8327   | 8327   | 8.84   | <b>0.011</b> | 1      | 6201   | 6201   | 1.06  | 0.323        |
| X <sub>1</sub> *X <sub>3</sub>                 | 1    | 19460   | 19460   | 1.13   | 0.308        | 1        | 6006   | 6006   | 6.38   | <b>0.025</b> | 1      | 1791   | 1791   | 0.30  | 0.590        |
| X <sub>2</sub> *X <sub>3</sub>                 | 1    | 380     | 380     | 0.02   | 0.884        | 1        | 1557   | 1557   | 1.65   | 0.221        | 1      | 351    | 351    | 0.06  | 0.811        |
| Interaccions of 3 terms                        | 1    | 12656   | 12656   | 0.73   | 0.408        | 1        | 2172   | 2172   | 2.31   | 0.153        | 1      | 7074   | 7074   | 1.20  | 0.292        |
| X <sub>1</sub> *X <sub>2</sub> *X <sub>3</sub> | 1    | 12656   | 12656   | 0.73   | 0.408        | 1        | 2172   | 2172   | 2.31   | 0.153        | 1      | 7074   | 7074   | 1.20  | 0.292        |
| Curvature                                      | 1    | 5378858 | 5378858 | 310.99 | <b>0.000</b> | 1        | 307952 | 307952 | 326.93 | <b>0.000</b> | 1      | 259171 | 259171 | 44.14 | <b>0.000</b> |
| Error                                          | 13   | 224845  | 17296   |        |              | 13       | 12245  | 942    |        |              | 13     | 76334  | 5872   |       |              |
| Total                                          | 21   | 6275545 |         |        |              | 21       | 357297 |        |        |              | 21     | 359383 |        |       |              |

X<sub>1</sub>: Solvent relation, X<sub>2</sub>: Amplitude, X<sub>3</sub>: Sonication time.

**Table S2.** Analysis of variance (ANOVA) for flavonoids content.

| FLAVONOIDS                                     |        |            |            |            |              |          |            |            |            |              |        |            |            |            |              |
|------------------------------------------------|--------|------------|------------|------------|--------------|----------|------------|------------|------------|--------------|--------|------------|------------|------------|--------------|
|                                                | PEEL   |            |            |            |              | ENDOCARP |            |            |            |              | KERNEL |            |            |            |              |
| Source                                         | D<br>F | SS<br>Adj. | MS<br>Adj. | F<br>Value | P<br>Value   | DF       | SS<br>Adj. | MS<br>Adj. | F<br>Value | P<br>Value   | DF     | SS<br>Adj. | MS<br>Adj. | F<br>Value | P<br>Value   |
| Model                                          | 8      | 2186947    | 273368     | 11.74      | <b>0.000</b> | 8        | 167902     | 20987.8    | 5.63       | <b>0.003</b> | 8      | 424777     | 53097      | 76.32      | <b>0.000</b> |
| Linear                                         | 3      | 439125     | 146375     | 6.29       | <b>0.007</b> | 3        | 10777      | 3592.5     | 0.96       | 0.439        | 3      | 108880     | 36293      | 52.16      | <b>0.000</b> |
| X <sub>1</sub>                                 | 1      | 393850     | 393850     | 16.92      | <b>0.001</b> | 1        | 156        | 156.2      | 0.04       | 0.841        | 1      | 21470      | 21470      | 30.86      | <b>0.000</b> |
| X <sub>2</sub>                                 | 1      | 3791       | 3791       | 0.16       | 0.693        | 1        | 3906       | 3906.2     | 1.05       | 0.325        | 1      | 36470      | 36470      | 52.42      | <b>0.000</b> |
| X <sub>3</sub>                                 | 1      | 41484      | 41484      | 1.78       | 0.205        | 1        | 6715       | 6715.0     | 1.80       | 0.203        | 1      | 50940      | 50940      | 73.22      | <b>0.000</b> |
| Interaccions<br>of 2 terms                     | 3      | 30462      | 10154      | 0.44       | 0.731        | 3        | 111117     | 37038.9    | 9.93       | <b>0.001</b> | 3      | 145856     | 48619      | 69.88      | <b>0.000</b> |
| X <sub>1</sub> *X <sub>2</sub>                 | 1      | 1708       | 1708       | 0.07       | 0.791        | 1        | 39447      | 39446.5    | 10.58      | <b>0.006</b> | 1      | 133930     | 133930     | 192.49     | <b>0.000</b> |
| X <sub>1</sub> *X <sub>3</sub>                 | 1      | 20758      | 20758      | 0.89       | 0.362        | 1        | 31113      | 31112.9    | 8.35       | <b>0.013</b> | 1      | 3650       | 3650       | 5.25       | <b>0.039</b> |
| X <sub>2</sub> *X <sub>3</sub>                 | 1      | 7997       | 7997       | 0.34       | 0.568        | 1        | 40557      | 40557.3    | 10.88      | <b>0.006</b> | 1      | 8276       | 8276       | 11.89      | <b>0.004</b> |
| Interaccions<br>of 3 terms                     | 1      | 51         | 51         | 0.00       | 0.963        | 1        | 30141      | 30140.8    | 8.08       | <b>0.014</b> | 1      | 34896      | 34896      | 50.16      | <b>0.000</b> |
| X <sub>1</sub> *X <sub>2</sub> *X <sub>3</sub> | 1      | 51         | 51         | 0.00       | 0.963        | 1        | 30141      | 30140.8    | 8.08       | <b>0.014</b> | 1      | 34896      | 34896      | 50.16      | <b>0.000</b> |
| Curvature                                      | 1      | 1717308    | 1717308    | 73.76      | <b>0.000</b> | 1        | 15867      | 15867.1    | 4.26       | 0.060        | 1      | 135145     | 135145     | 194.24     | <b>0.000</b> |
| Error                                          | 13     | 302658     | 23281      |            |              | 13       | 48467      | 3728.2     |            |              | 13     | 9045       | 696        |            |              |
| Total                                          | 21     | 2489605    |            |            |              | 21       | 216369     |            |            |              | 21     | 433821     |            |            |              |

X<sub>1</sub>: Solvent relation, X<sub>2</sub>: Amplitude, X<sub>3</sub>: Sonication time.

**Table S3.** Analysis of variance (ANOVA) for antioxidant activity ABTS.

| ABTS ANTIOXIDANT ACTIVITY                      |      |            |            |            |              |          |            |            |            |              |        |            |            |            |              |
|------------------------------------------------|------|------------|------------|------------|--------------|----------|------------|------------|------------|--------------|--------|------------|------------|------------|--------------|
| Source                                         | PEEL |            |            |            |              | ENDOCARP |            |            |            |              | KERNEL |            |            |            |              |
|                                                | DF   | SS<br>Adj. | MS<br>Adj. | F<br>Value | P<br>Value   | DF       | SS<br>Adj. | MS<br>Adj. | F<br>Value | P<br>Value   | DF     | SS<br>Adj. | MS<br>Adj. | F<br>Value | P<br>Value   |
| Model                                          | 8    | 3458.66    | 432.33     | 3.46       | <b>0.023</b> | 8        | 62.937     | 7.8672     | 18.32      | <b>0.000</b> | 8      | 1515.65    | 189.456    | 105.17     | <b>0.000</b> |
| Linear                                         | 3    | 3111.60    | 1037.2     | 8.31       | <b>0.002</b> | 3        | 5.5905     | 1.8635     | 4.34       | <b>0.025</b> | 3      | 587.03     | 195.677    | 108.62     | <b>0.000</b> |
| X <sub>1</sub>                                 | 1    | 2224.07    | 2224.0     | 17.82      | <b>0.001</b> | 1        | 5.4406     | 5.4406     | 12.67      | <b>0.003</b> | 1      | 38.35      | 38.347     | 21.29      | <b>0.000</b> |
| X <sub>2</sub>                                 | 1    | 280.90     | 280.90     | 2.25       | 0.157        | 1        | 0.0014     | 0.0014     | 0.00       | 0.956        | 1      | 108.84     | 108.837    | 60.42      | <b>0.000</b> |
| X <sub>3</sub>                                 | 1    | 606.64     | 606.64     | 4.86       | <b>0.046</b> | 1        | 0.1486     | 0.1486     | 0.35       | 0.566        | 1      | 439.85     | 439.846    | 244.16     | <b>0.000</b> |
| Interactions of<br>2 terms                     | 3    | 187.01     | 62.34      | 0.50       | 0.689        | 3        | 4.6174     | 1.5391     | 3.59       | <b>0.044</b> | 3      | 874.55     | 291.515    | 161.82     | <b>0.000</b> |
| X <sub>1</sub> *X <sub>2</sub>                 | 1    | 147.50     | 147.50     | 1.18       | 0.297        | 1        | 4.5412     | 4.5412     | 10.58      | 0.006        | 1      | 633.91     | 633.907    | 351.88     | <b>0.000</b> |
| X <sub>1</sub> *X <sub>3</sub>                 | 1    | 2.61       | 2.61       | 0.02       | 0.887        | 1        | 0.0274     | 0.0274     | 0.06       | 0.805        | 1      | 137.77     | 137.769    | 76.48      | <b>0.000</b> |
| X <sub>2</sub> *X <sub>3</sub>                 | 1    | 36.91      | 36.91      | 0.30       | 0.596        | 1        | 0.0488     | 0.0488     | 0.11       | 0.741        | 1      | 102.87     | 102.870    | 57.10      | <b>0.000</b> |
| Interactions of<br>3 terms                     | 1    | 2.02       | 2.02       | 0.02       | 0.901        | 1        | 1.5600     | 1.5600     | 3.63       | 0.079        | 1      | 5.97       | 5.966      | 3.31       | 0.092        |
| X <sub>1</sub> *X <sub>2</sub> *X <sub>3</sub> | 1    | 2.02       | 2.02       | 0.02       | 0.901        | 1        | 1.5600     | 1.5600     | 3.63       | 0.079        | 1      | 5.97       | 5.966      | 3.31       | 0.092        |
| Curvature                                      | 1    | 158.03     | 158.03     | 1.27       | 0.281        | 1        | 51.169     | 51.169     | 119.19     | <b>0.000</b> | 1      | 48.10      | 48.104     | 26.70      | <b>0.000</b> |
| Error                                          | 13   | 1622.33    | 124.79     |            |              | 13       | 5.5811     | 0.4293     |            |              | 13     | 23.42      | 1.801      |            |              |
| Total                                          | 21   | 5080.99    |            |            |              | 21       | 68.518     |            |            |              | 21     | 1539.06    |            |            |              |

X<sub>1</sub>: Solvent relation, X<sub>2</sub>: Amplitude, X<sub>3</sub>: Sonication time.

**Table S4.** Analysis of variance (ANOVA) for antioxidant activity DPPH.

| DPPH ANTIOXIDANT ACTIVITY                      |      |            |            |            |              |          |            |            |            |            |        |            |            |            |              |
|------------------------------------------------|------|------------|------------|------------|--------------|----------|------------|------------|------------|------------|--------|------------|------------|------------|--------------|
| Source                                         | PEEL |            |            |            |              | ENDOCARP |            |            |            |            | KERNEL |            |            |            |              |
|                                                | DF   | SS<br>Adj. | MS<br>Adj. | F<br>Value | P<br>Value   | DF       | SS<br>Adj. | MS<br>Adj. | F<br>Value | P<br>Value | DF     | SS<br>Adj. | MS<br>Adj. | F<br>Value | P<br>Value   |
| Model                                          | 8    | 11840.6    | 1480.08    | 16.95      | <b>0.000</b> | 8        | 2.34267    | 0.29283    | 0.65       | 0.723      | 8      | 5085.90    | 635.74     | 358.98     | <b>0.000</b> |
| Linear                                         | 3    | 4182.5     | 1394.17    | 15.97      | <b>0.000</b> | 3        | 1.57996    | 0.52665    | 1.17       | 0.358      | 3      | 442.87     | 147.62     | 83.36      | <b>0.000</b> |
| X <sub>1</sub>                                 | 1    | 3806.6     | 3806.58    | 43.60      | <b>0.000</b> | 1        | 0.24059    | 0.24059    | 0.54       | 0.477      | 1      | 92.40      | 92.40      | 52.18      | <b>0.000</b> |
| X <sub>2</sub>                                 | 1    | 3.7        | 3.73       | 0.04       | 0.839        | 1        | 0.15563    | 0.15563    | 0.35       | 0.566      | 1      | 34.08      | 34.08      | 19.24      | <b>0.001</b> |
| X <sub>3</sub>                                 | 1    | 372.2      | 372.20     | 4.26       | 0.059        | 1        | 1.18374    | 1.18374    | 2.64       | 0.128      | 1      | 316.40     | 316.40     | 178.66     | <b>0.000</b> |
| Interaccions<br>of 2 terms                     | 3    | 62.5       | 20.84      | 0.24       | 0.868        | 3        | 0.38288    | 0.12763    | 0.28       | 0.836      | 3      | 294.91     | 98.30      | 55.51      | <b>0.000</b> |
| X <sub>1</sub> *X <sub>2</sub>                 | 1    | 29.7       | 29.68      | 0.34       | 0.570        | 1        | 0.37946    | 0.37946    | 0.85       | 0.375      | 1      | 151.60     | 151.60     | 85.60      | <b>0.000</b> |
| X <sub>1</sub> *X <sub>3</sub>                 | 1    | 11.5       | 11.48      | 0.13       | 0.723        | 1        | 0.00308    | 0.00308    | 0.01       | 0.935      | 1      | 94.14      | 94.14      | 53.16      | <b>0.000</b> |
| X <sub>2</sub> *X <sub>3</sub>                 | 1    | 21.4       | 21.37      | 0.24       | 0.629        | 1        | 0.00034    | 0.00034    | 0.00       | 0.978      | 1      | 49.18      | 49.18      | 27.77      | <b>0.000</b> |
| Interaccions<br>of 3 terms                     | 1    | 40.7       | 40.67      | 0.47       | 0.507        | 1        | 0.36120    | 0.36120    | 0.80       | 0.386      | 1      | 14.23      | 14.23      | 8.04       | <b>0.014</b> |
| X <sub>1</sub> *X <sub>2</sub> *X <sub>3</sub> | 1    | 40.7       | 40.67      | 0.47       | 0.507        | 1        | 0.36120    | 0.36120    | 0.80       | 0.386      | 1      | 14.23      | 14.23      | 8.04       | <b>0.014</b> |
| Curvature                                      | 1    | 7554.9     | 7554.94    | 86.54      | <b>0.000</b> | 1        | 0.01863    | 0.01863    | 0.04       | 0.842      | 1      | 4333.89    | 4333.89    | 2447.22    | <b>0.000</b> |
| Error                                          | 13   | 1134.9     | 87.30      |            |              | 13       | 5.83453    | 0.44881    |            |            | 13     | 23.02      | 1.77       |            |              |
| Total                                          | 21   | 12975.5    |            |            |              | 21       | 8.17720    |            |            |            | 21     | 5108.92    |            |            |              |

X<sub>1</sub>: Solvent relation, X<sub>2</sub>: Amplitude, X<sub>3</sub>: Sonication time.

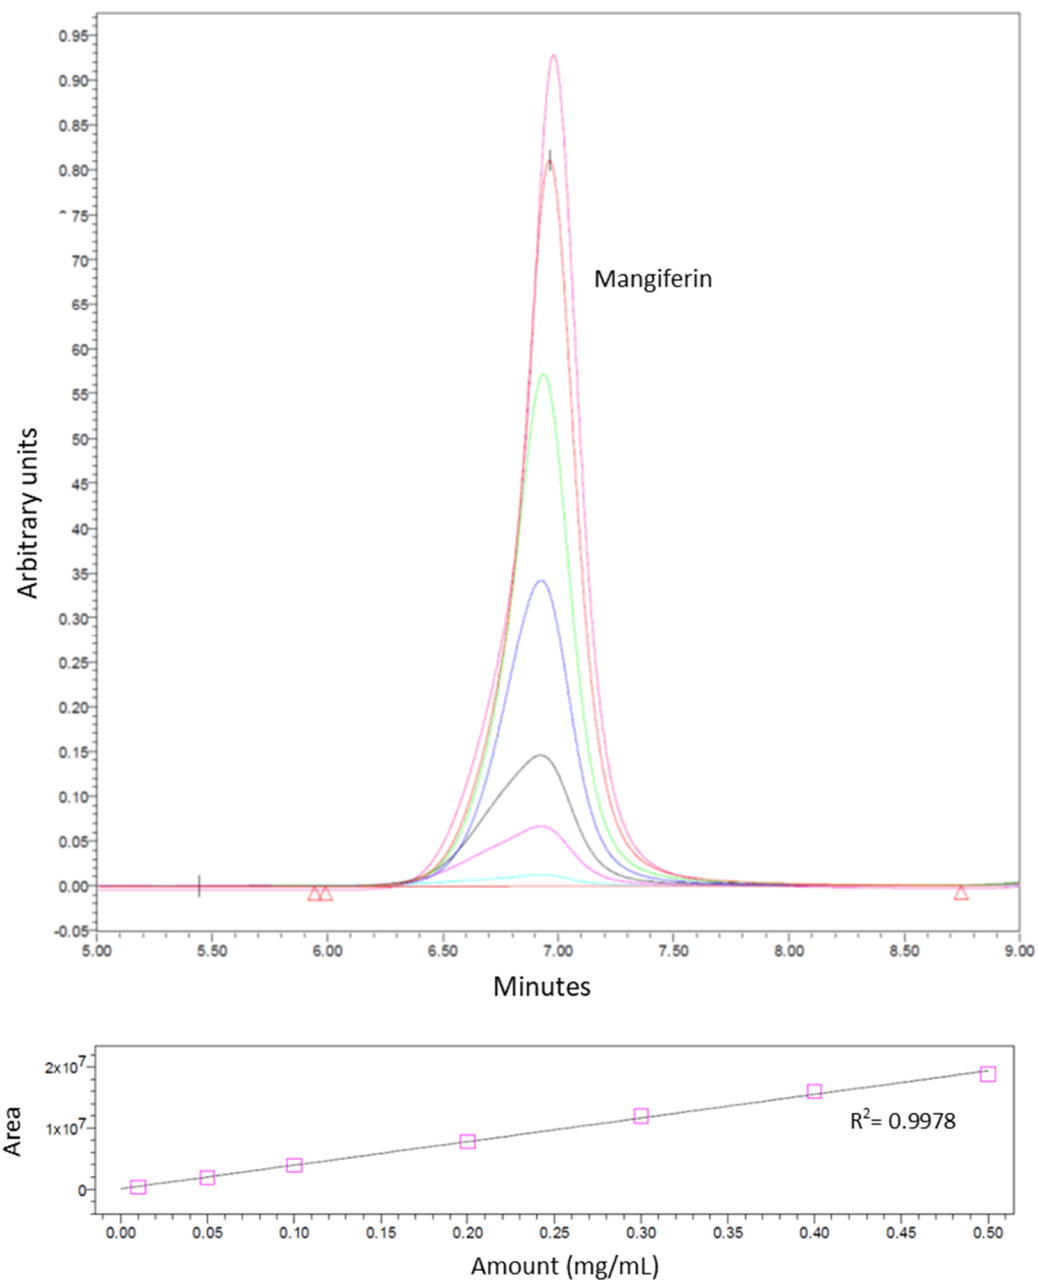

Figure S1. Chromatograms and calibration curve of mangiferin.
